# Supplementary material for: Genetic Heterogeneity and Mutated PreS Analysis of Duck Hepatitis B Virus Recently Isolated from Ducks and Geese in China
Source: MDPI journal article supplement (doi:10.3390/ani13081282), 2023-04-08
Supplement: s1 [file s1]

Supplementary Table S1: Detailed information regarding the stains used in this study.

| Accession No. | Strain Name   | Avian Species | Isolation Region | Genome Length |
|---------------|---------------|---------------|------------------|---------------|
| OQ183597      | Y200825       | Duck          | Anhui, China     | 3024          |
| OQ183598      | Y200106       | Duck          | Henan, China     | 3024          |
| OQ183599      | Y201009       | Duck          | Hubei, China     | 3024          |
| OQ183600      | Y210928       | Duck          | Jiangsu, China   | 3027          |
| OQ183601      | Y220201       | Duck          | Henan, China     | 3027          |
| OQ183602      | Y211013       | Duck          | Anhui, China     | 3024          |
| OQ183603      | Y220217       | Duck          | Henan, China     | 3024          |
| OQ183604      | Y200122       | Duck          | Anhui, China     | 3027          |
| OQ183605      | Y200226       | Duck          | Henan, China     | 3024          |
| OQ183606      | Y200619       | Duck          | Anhui, China     | 3027          |
| OQ183607      | Y200722       | Duck          | Hubei, China     | 3024          |
| OQ183608      | Y210829       | Duck          | Jiangsu, China   | 3024          |
| OQ183609      | E200402       | Goose         | Anhui, China     | 3027          |
| OQ183610      | E200422       | Goose         | Hubei, China     | 3027          |
| OQ183611      | E200731       | Goose         | Henan, China     | 3027          |
| OQ183612      | E210501       | Goose         | Anhui, China     | 3027          |
| OQ183613      | E210321       | Goose         | Jiangsu, China   | 3027          |
| OQ183614      | E210526       | Goose         | Henan, China     | 3027          |
| OQ183615      | E210620       | Goose         | Hubei, China     | 3027          |
| OQ183616      | E210814       | Goose         | Jiangsu, China   | 3027          |
| OQ183617      | E220324       | Goose         | Hubei, China     | 3027          |
| OQ183618      | E200529       | Goose         | Anhui, China     | 3027          |
| OQ183619      | E200801       | Goose         | Hubei, China     | 3027          |
| AF047045      | DHBV-AF047045 | Duck          | Canada           | 3021          |
| AF404406      | DHBV-AF404406 | Duck          | China            | 3024          |
| AF493986      | Indiana       | Duck          | USA              | 3021          |
| AF505512      | DHBV-AF505512 | Duck          | USA              | 3021          |
| AJ006350      | DHBV-AJ006350 | Duck          | Australia        | 3027          |
| AY250901      | 31            | Duck          | South Africa     | 3021          |
| AY250902      | 102           | Duck          | South Africa     | 3021          |
| AY250903      | 8             | Duck          | South Africa     | 3021          |
| AY294028      | ST10          | Duck          | South Africa     | 3021          |
| AY294029      | D1            | Duck          | South Africa     | 3021          |
| AY294656      | DHBV-AY294656 | Duck          | China            | 3021          |
| AY392760      | GD1           | Duck          | China            | 3027          |
| AY433937      | GD2           | Duck          | China            | 3027          |
| AY521226      | A             | Duck          | China            | 3027          |
| AY521227      | B             | Duck          | China            | 3027          |
| AY536371      | GD3           | Duck          | China            | 3027          |
| DQ195079      | 3             | Duck          | Germany          | 3021          |
| DQ276978      | DHBV-DQ276978 | Duck          | China            | 3024          |
| EU429324      | CH4           | Duck          | China            | 3006          |

|          |             |            |         |      |
|----------|-------------|------------|---------|------|
| EU429325 | CH5         | Duck       | China   | 3006 |
| EU429326 | CH6         | Duck       | China   | 3006 |
| M21953   | DHBV-M21953 | Duck       | China   | 3024 |
| M32990   | DHBV-M32990 | Duck       | China   | 3027 |
| M32991   | DHBV-M32991 | Duck       | China   | 3027 |
| X12798   | DHBV-X12798 | Duck       | Germany | 3021 |
| X58569   | DHBV-X58569 | Duck       | Germany | 3024 |
| X74623   | DHBV-X74623 | Duck       | India   | 3021 |
| HQ214130 | DHBV-XY     | Duck       | China   | 3021 |
| MF471769 | SD-02       | Duck       | China   | 3021 |
| JX469896 | DHBV        | Duck       | China   | 3027 |
| AF110996 | SGHBV1-13   | Snow goose | Germany | 3024 |

---
